# Supplementary material for: Atomic scale insights into the epitaxial growth mechanism of 2D Cr3Te4 on mica
Source: Royal Society of Chemistry journal article supplement (doi:10.1039/d2na00835a), 2022-12-15
Supplement: d2na00835a1.pdf [file d2na00835a1.pdf]

## Atomic scale insights into the epitaxial growth mechanism of 2D $\text{Cr}_3\text{Te}_4$ on mica

### Supplementary Information

Hailin Yang,<sup>a</sup> An Wu,<sup>a</sup> Huaxin Yi,<sup>a</sup> Weiwei Cao,<sup>a</sup> Jiandong Yao,<sup>a</sup> Guowei Yang,<sup>a</sup> and Yi-Chao Zou<sup>\*a</sup>

<sup>a</sup>*School of Materials Science & Engineering, State Key Laboratory of Optoelectronic Materials and Technologies, Nanotechnology Research Center, Sun Yat-sen University, Guangzhou, 510275, P. R. China*

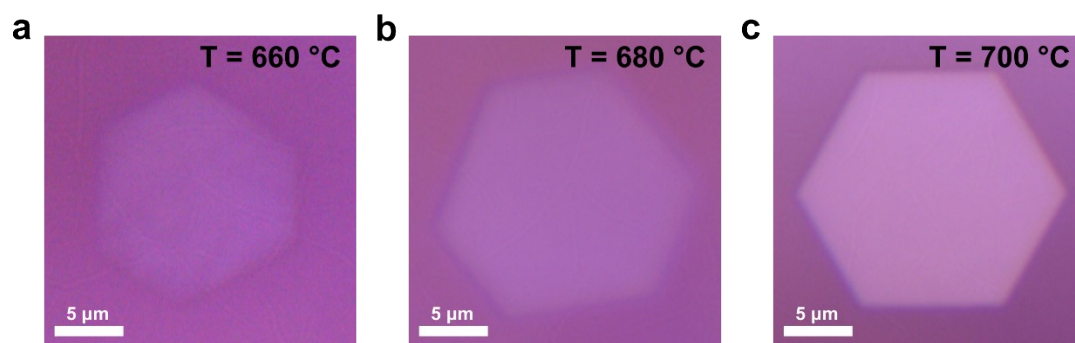

**Fig. S1** Optical images taken from typical  $\text{Cr}_3\text{Te}_4$  samples obtained by various growth temperatures, for a growth temperature ( $T$ ) of 660°C (a), 680°C (b), and 700°C (c), respectively. The thickness of the nanoplates shown is ~15 nm in S1a, ~37 nm in S1b, and ~80 nm in S1c. This indicates that the thickness of the nanoplates can be reduced by a decreased growth temperature in the chemical vapour deposition process.
